# Supplementary material
Source: HighWire-hosted journal article supplement (https://gut.bmj.com/content/67/7/1290)
Supplement: inline-supplementary-material-2 [file inline-supplementary-material-2.pdf]

Supplemental Table 1. TaqMan® Gene Expression Assays for Gene Validation\*

| Gene                                | TaqMan® Assay Number |
|-------------------------------------|----------------------|
| <i>Hoxb13</i>                       | Mm00433968_m1        |
| <i>Rprm</i> (or Reprimo)            | Mm00469773_s1        |
| <i>Mre11a</i>                       | Mm00450600_m1        |
| <i>Cdk1</i>                         | Mm00772472_m1        |
| <i>Cdk7</i>                         | Mm01282896_m1        |
| <i>Myc</i>                          | Mm00487804_m1        |
| <i>Cxcl5</i>                        | Mm00436451_g1        |
| <i>Fabp7</i>                        | Mm00445225_m1        |
| <i>Ctnnb1</i> (or $\beta$ -catenin) | Mm00483039_ml        |
| <i>Pten</i>                         | Mm00477208_m1        |
| <i>Tesc</i>                         | Mm00498717_m1        |
| <i>Pthlh</i>                        | Mm00436057_m1        |
| <i>Mapk11</i>                       | Mm00440955_m1        |
| <i>Igf1</i>                         | Mm00439560_m1        |
| <i>Hprt1</i>                        | Mm00446968_m1        |
| <i>Tfrc</i>                         | Mm00441941_m1        |

\*TaqMan® assays were obtained from Life Technologies. Each sample was run in triplicate, according to the manufacturer's protocol.

Supplemental Table 2. Tumor Data Summary for In Vivo Experiment\*

| Treatment    | Tumor Status at Baseline | N  | Gross SI Tumor (Mean $\pm$ SEM) | Colon Adenomas (Mean $\pm$ SEM) | Colon Microadenomas (Mean $\pm$ SEM) | Colon Tumor Volume (mm <sup>3</sup> ) (Mean $\pm$ SEM) | Tumor Incidence (%) |
|--------------|--------------------------|----|---------------------------------|---------------------------------|--------------------------------------|--------------------------------------------------------|---------------------|
| Control      | All mice                 | 20 | 49.5 $\pm$ 3.93                 | 4.6 $\pm$ 0.88                  | 1.0 $\pm$ 0.39                       | 7.4 $\pm$ 1.20                                         |                     |
|              | Tumor-bearing            | 12 |                                 | 6.4 $\pm$ 1.17                  | 1.3 $\pm$ 0.64                       | 7.4 $\pm$ 1.83                                         |                     |
|              | Tumor-free               | 8  |                                 | 1.8 $\pm$ 0.48                  | 0.6 $\pm$ 0.20                       | 7.5 $\pm$ 1.11                                         | 87.5%               |
| Sulindac     | All mice                 | 20 | 22.7 $\pm$ 2.74                 | 3.4 $\pm$ 0.85                  | 0.6 $\pm$ 0.22                       | 4.1 $\pm$ 0.63                                         |                     |
|              | Tumor-bearing            | 9  |                                 | 4.8 $\pm$ 1.54                  | 0.9 $\pm$ 0.45                       | 5.1 $\pm$ 0.50                                         |                     |
|              | Tumor-free               | 11 |                                 | 2.2 $\pm$ 0.51                  | 0.4 $\pm$ 0.20                       | 3.2 $\pm$ 0.88                                         | 90.9%               |
| Atorvastatin | All mice                 | 19 | 54.3 $\pm$ 5.98                 | 3.3 $\pm$ 0.77                  | 0.6 $\pm$ 0.22                       | 8.5 $\pm$ 1.75                                         |                     |
|              | Tumor-bearing            | 10 |                                 | 5.4 $\pm$ 1.32                  | 1.1 $\pm$ 0.37                       | 10.1 $\pm$ 2.30                                        |                     |
|              | Tumor-free               | 9  |                                 | 1.2 $\pm$ 0.49                  | 0 $\pm$ 0                            | 5.18 $\pm$ 1.68                                        | 55.6%               |
| Sul/Atorva   | All mice                 | 22 | 29.2 $\pm$ 2.86                 | 2.9 $\pm$ 0.48                  | 0.5 $\pm$ 0.16                       | 7.8 $\pm$ 1.14                                         |                     |
|              | Tumor-bearing            | 12 |                                 | 3.7 $\pm$ 0.74                  | 0.8 $\pm$ 0.22                       | 8.1 $\pm$ 0.99                                         |                     |
|              | Tumor-free               | 10 |                                 | 1.9 $\pm$ 0.48                  | 0.3 $\pm$ 0.2                        | 7.3 $\pm$ 2.37                                         | 70%                 |

\* P values are presented in Figure 2 and 4.

Supplemental Table 3. Effect of Sulindac and/or Atorvastatin on Cell Cycle Analysis in SW480 Cells\*

| <b>Treatment</b>         | <b>G0/G1 (%)</b>         | <b>S (%)</b>             | <b>G2/M (%)</b> |
|--------------------------|--------------------------|--------------------------|-----------------|
| DMSO                     | 56.6 ± 0.93              | 29.8 ± 4.92              | 10.9 ± 1.19     |
| Sulindac 120 µM          | 55.8 ± 1.03              | 32.6 ± 0.52              | 11.3 ± 0.45     |
| Sulindac 60 µM           | 55.0 ± 1.27              | 32.5 ± 0.64              | 12.1 ± 0.43     |
| Sulindac 30 µM           | 58.5 ± 1.77              | 31.7 ± 0.98              | 11.6 ± 0.61     |
| Atorvastatin 1 µM        | 57.8 ± 1.69              | 31.0 ± 0.65              | 11.4 ± 1.54     |
| Atorvastatin 0.5 µM      | 60.4 ± 3.67              | 32.8 ± 3.22              | 9.4 ± 2.77      |
| Atorvastatin 0.1 µM      | 58.6 ± 1.59              | 29.8 ± 0.78              | 12.8 ± 0.29     |
| Sul/Atorva 120 µM/1 µM   | 78.0 ± 0.46 <sup>§</sup> | 14.5 ± 0.07 <sup>§</sup> | 10.2 ± 0.38     |
| Sul/Atorva 120 µM/0.5 µM | 69.7 ± 0.43 <sup>§</sup> | 21.5 ± 0.72 <sup>§</sup> | 11.7 ± 0.23     |
| Sul/Atorva 120 µM/0.1 µM | 58.2 ± 0.43              | 31.9 ± 0.56              | 11.6 ± 0.50     |
| Sul/Atorva 60 µM/1 µM    | 76.2 ± 1.10 <sup>Δ</sup> | 16.9 ± 0.99 <sup>Δ</sup> | 10.7 ± 0.29     |
| Sul/Atorva 60 µM/0.5 µM  | 69.0 ± 1.38 <sup>Δ</sup> | 24.6 ± 1.44 <sup>Δ</sup> | 9.4 ± 1.60      |
| Sul/Atorva 60 µM/0.1 µM  | 68.2 ± 1.91 <sup>Δ</sup> | 23.7 ± 1.41 <sup>Δ</sup> | 11.6 ± 0.14     |
| Sul/Atorva 30 µM/1 µM    | 65.5 ± 2.15              | 31.8 ± 0.80              | 6.4 ± 1.40      |
| Sul/Atorva 30 µM/0.5 µM  | 61.4 ± 1.18              | 30.1 ± 1.74              | 10.7 ± 1.38     |
| Sul/Atorva 30 µM/0.1 µM  | 59.9 ± 1.70              | 28.3 ± 1.42              | 12.5 ± 0.59     |

\* Data is shown as Mean ± SEM. N=3 per treatment.

<sup>§</sup> P < 0.004 when compared to those of Sulindac 120 µM.

<sup>Δ</sup> P < 0.004 when compared to those of Sulindac 60 µM.
